# Supplementary material for: Predictive and Prognostic Significance of mRNA Expression and DNA Copies Aberrations of ERCC1, RRM1, TOP1, TOP2A, TUBB3, TYMS, and GSTP1 Genes in Patients with Breast Cancer
Source: MDPI journal article supplement (doi:10.3390/diagnostics12020405), 2022-02-04
Supplement: s1 [file s1]

## Supplement 1

Table S1 - Relationship between the expression of genes of chemosensitivity with the main clinical and pathological parameters (median/percentile 25-75%).

| Clinical and pathological parameter |              | Age        |            |                 | Tumor size       |                  |                 | Lymphogenous metastasis |                  |                 | Histological form |            |                 | Menstrual status |            |                 |
|-------------------------------------|--------------|------------|------------|-----------------|------------------|------------------|-----------------|-------------------------|------------------|-----------------|-------------------|------------|-----------------|------------------|------------|-----------------|
|                                     |              | <45        | >45        | <i>p</i> -level | T <sub>1-2</sub> | T <sub>3-4</sub> | <i>p</i> -level | N <sub>0</sub>          | N <sub>1-3</sub> | <i>p</i> -level | Uni               | Multi      | <i>p</i> -level | Pre-             | Post-      | <i>p</i> -level |
| Expression before NAC               | <i>RRM1</i>  | 1.01±0.14  | 1.16±0.24  | 0.46            | 1.08±0.16        | 1.23±0.40        | 0.44            | 1.23±0.28               | 0.99±0.14        | 0.91            | 0.87±0.14         | 1.25±0.22  | 0.56            | 0.97±0.13        | 1.20±0.25  | 0.56            |
|                                     | <i>ERCC1</i> | 0.56±0.14  | 0.58±0.12  | 0.67            | 0.57±0.10        | 0.55±0.20        | 0.68            | 0.57±0.18               | 0.57±0.10        | 0.77            | 0.58±0.15         | 0.56±0.12  | 0.98            | 0.66±0.13        | 0.47±0.13  | 0.41            |
|                                     | <i>TOP1</i>  | 0.82±0.17  | 6.47±5.71  | 0.06            | 4.36±3.56        | 0.70±0.18        | 0.65            | 0.80±0.19               | 6.09±5.31        | 0.74            | 8.58±7.76         | 0.77±0.14  | 0.38            | 6.74±5.94        | 0.77±0.17  | 0.69            |
|                                     | <i>TOP2a</i> | 15.54±4.20 | 12.33±3.75 | 0.38            | 13.80±3.07       | 13.46±5.71       | 0.83            | 13.81±4.93              | 13.74±3.30       | 0.87            | 9.13±1.58         | 16.94±4.54 | 0.87            | 14.50±3.69       | 12.94±4.27 | 0.91            |
|                                     | <i>TYMS</i>  | 1.29±0.22  | 1.39±0.20  | 0.61            | 1.32±0.15        | 1.56±0.54        | 0.97            | 1.54±0.24               | 1.22±0.18        | 0.18            | 1.62±0.25         | 1.16±0.17  | 0.14            | 1.43±0.22        | 1.25±0.19  | 0.86            |
|                                     | <i>TUBB3</i> | 3.72±0.64  | 3.01±0.47  | 0.59            | 3.20±0.39        | 4.32±1.47        | 0.68            | 3.61±0.66               | 3.13±0.47        | 0.83            | 2.68±0.41         | 3.77±0.58  | 0.83            | 3.56±0.53        | 3.07±0.56  | 0.38            |
|                                     | <i>GSTP1</i> | 0.44±0.13  | 0.77±0.32  | 0.12            | 0.61±0.21        | 0.70±0.46        | 0.39            | 0.55±0.22               | 0.67±0.28        | 0.39            | 0.99±0.44         | 0.37±0.10  | 0.06            | 0.75±0.32        | 0.47±0.18  | 0.81            |
| Expression after NAC                | <i>RRM1</i>  | 0.97±0.28  | 0.85±0.17  | 0.88            | 0.84±0.16        | 1.26±0.42        | 0.11            | 0.82±0.26               | 0.94±0.17        | 0.2             | 0.69±0.09         | 1.08±0.27  | 0.76            | 0.90±0.20        | 0.88±0.22  | 0.51            |
|                                     | <i>ERCC1</i> | 0.76±0.31  | 1.44±0.84  | 0.69            | 1.31±0.62        | 0.27±0.15        | 0.25            | 0.48±0.14               | 1.59±0.85        | 0.13            | 1.78±1.10         | 0.63±0.23  | 0.14            | 1.80±0.99        | 0.46±0.13  | 0.07            |
|                                     | <i>TOP1</i>  | 0.80±0.24  | 0.96±0.38  | 0.84            | 0.85±0.28        | 1.34±0.57        | <b>0.02</b>     | 0.51±0.11               | 1.13±0.40        | 0.94            | 1.01±0.50         | 0.81±0.17  | 0.12            | 1.17±0.46        | 0.58±0.11  | 0.49            |
|                                     | <i>TOP2a</i> | 10.73±3.33 | 4.57±1.12  | 0.17            | 6.29±1.42        | 10.29±5.80       | 0.63            | 7.77±3.06               | 6.11±1.37        | 0.42            | 6.90±2.07         | 6.54±1.93  | 0.71            | 8.84±2.23        | 4.16±1.44  | <b>0.05</b>     |
|                                     | <i>TYMS</i>  | 1.76±0.70  | 2.13±0.80  | 0.9             | 1.76±0.59        | 3.99±2.02        | 0.08            | 2.72±1.39               | 1.59±0.43        | 0.66            | 1.27±0.29         | 2.68±1.07  | 0.45            | 1.830.50±        | 2.20±1.12  | 0.41            |
|                                     | <i>TUBB3</i> | 3.87±1.29  | 3.32±0.62  | 0.85            | 3.47±0.65        | 3.92±1.46        | 0.44            | 3.93±0.98               | 3.28±0.77        | 0.29            | 3.79±0.80         | 3.25±0.90  | 0.39            | 4.27±0.90        | 2.61±0.73  | 0.06            |
|                                     | <i>GSTP1</i> | 0.49±0.10  | 0.53±0.07  | 0.41            | 0.54±0.06        | 0.38±0.15        | 0.32            | 0.52±0.09               | 0.52±0.08        | 0.78            | 0.54±0.09         | 0.50±0.07  | 0.83            | 0.56±0.09        | 0.47±0.07  | 0.87            |

Note: Histological form: Uni - unicentric. Multi - multicentric; Menstrual status: Pre-premenopause. Post-postmenopause. Statistically significant differences are in bold.

Table S2 - The frequency of chromosomal aberrations in the genes of chemosensitivity, depending on the effect and scheme of NAC.

| Genes        | CNA             | Age       |           | Tumor size       |                  | Lymphogenous metastasis |                  | Histological form |           | Menstrual status |                  |
|--------------|-----------------|-----------|-----------|------------------|------------------|-------------------------|------------------|-------------------|-----------|------------------|------------------|
|              |                 | ≤45       | >45       | T <sub>1-2</sub> | T <sub>3-4</sub> | N <sub>0</sub>          | N <sub>1-3</sub> | Uni               | Multi     | Pre-             | Post-            |
| <i>RRM1</i>  | Loss            | 15 (34.1) | 12 (22.6) | 23 (26.7)        | 4 (36.4)         | 9 (22.5)                | 18 (31.6)        | 13 (33.3)         | 14 (24.1) | 15 (29.4)        | 12 (26.1)        |
|              | n               | 27 (61.4) | 37 (69.8) | 58 (67.4)        | 6 (54.5)         | 27 (67.5)               | 37 (64.9)        | 25 (64.1)         | 39 (67.2) | 34 (66.7)        | 30 (65.2)        |
|              | Gain            | 2 (4.5)   | 4 (7.5)   | 5 (5.8)          | 1 (9.1)          | 4 (10.0)                | 2 (3.5)          | 1 (2.6)           | 5 (8.6)   | 2 (3.9)          | 4 (8.7)          |
|              | <i>p</i> -level | 0.4       |           | 0.69             |                  | 0.31                    |                  | 0.34              |           | 0.60             |                  |
| <i>ERCC1</i> | Loss            | 3 (6.8)   | 7 (13.2)  | 10 (11.6)        | 0 (0.0)          | 5 (12.5)                | 5 (8.8)          | 5 (12.8)          | 5 (8.6)   | 3 (5.9)          | 7 (15.2)         |
|              | n               | 38 (86.4) | 45 (84.9) | 72 (83.7)        | 11 (100.0)       | 35 (87.5)               | 48 (84.2)        | 33 (84.6)         | 50 (86.2) | 45 (88.2)        | 38 (82.6)        |
|              | Gain            | 3 (6.8)   | 1 (1.9)   | 4 (4.7)          | 0 (0.0)          | 0 (0.0)                 | 4 (7.0)          | 1 (2.6)           | 3 (5.2)   | 3 (5.9)          | 1 (2.2)          |
|              | <i>p</i> -level | 0.30      |           | 0.35             |                  | 0.20                    |                  | 0.67              |           | 0.22             |                  |
| <i>TOP1</i>  | Loss            | 1 (2.3)   | 2 (3.8)   | 3 (3.5)          | 0 (0.0)          | 2 (5.0)                 | 1 (1.8)          | 1 (2.6)           | 2 (3.4)   | 1 (2.0)          | 2 (4.3)          |
|              | n               | 29 (65.9) | 36 (67.9) | 57 (66.3)        | 8 (72.7)         | 23 (57.5)               | 42 (73.7)        | 27 (69.2)         | 38 (65.5) | 36 (70.6)        | 29 (63.0)        |
|              | Gain            | 14 (31.8) | 15 (28.3) | 26 (30.2)        | 3 (27.3)         | 15 (37.5)               | 14 (24.6)        | 11 (28.2)         | 18 (31.1) | 14 (27.5)        | 15 (32.6)        |
|              | <i>p</i> -level | 0.86      |           | 0.79             |                  | 0.21                    |                  | 0.91              |           | 0.64             |                  |
| <i>TOP2a</i> | Loss            | 13 (29.5) | 9 (17.0)  | 19 (22.1)        | 3 (27.3)         | 7 (17.5)                | 15 (26.3)        | 12 (30.8)         | 10 (17.2) | <b>15 (29.4)</b> | <b>7 (15.2)</b>  |
|              | n               | 23 (52.3) | 30 (56.6) | 47 (54.7)        | 6 (54.5)         | 20 (50.0)               | 33 (57.9)        | 20 (51.3)         | 33 (56.9) | <b>30 (58.8)</b> | <b>23 (50.0)</b> |
|              | Gain            | 8 (18.2)  | 14 (26.4) | 20 (23.3)        | 2 (18.2)         | 13 (32.5)               | 9 (15.8)         | 7 (17.9)          | 15 (25.9) | <b>6 (11.8)</b>  | <b>16 (34.8)</b> |
|              | <i>p</i> -level | 0.29      |           | 0.89             |                  | 0.13                    |                  | 0.26              |           | <b>0.01</b>      |                  |
| <i>TYMS</i>  | Loss            | 13 (29.5) | 12 (22.6) | 22 (25.6)        | 3 (27.3)         | 7 (17.5)                | 18 (31.6)        | 8 (20.5)          | 17 (29.3) | 15 (29.4)        | 10 (21.7)        |
|              | n               | 29 (65.9) | 37 (69.8) | 58 (67.4)        | 8 (72.7)         | 29 (72.5)               | 37 (64.9)        | 27 (69.2)         | 39 (67.2) | 34 (66.7)        | 32 (69.6)        |
|              | Gain            | 2 (4.5)   | 4 (7.5)   | 6 (7.0)          | 0 (0.0)          | 4 (10.0)                | 2 (3.5)          | 4 (10.3)          | 2 (3.4)   | 2 (3.9)          | 4 (8.7)          |
|              | <i>p</i> -level | 0.65      |           | 0.66             |                  | 0.16                    |                  | 0.29              |           | 0.47             |                  |
| <i>TUBB3</i> | Loss            | 26 (59.1) | 29 (54.7) | 49 (57.0)        | 6 (54.5)         | 23 (57.5)               | 32 (56.1)        | 23 (59.0)         | 32 (55.2) | 29 (56.9)        | 26 (56.5)        |
|              | n               | 15 (34.1) | 21 (39.6) | 32 (37.2)        | 4 (36.4)         | 14 (35.0)               | 22 (38.6)        | 15 (38.5)         | 21 (36.2) | 20 (39.2)        | 16 (34.8)        |
|              | Gain            | 3 (6.8)   | 3 (5.7)   | 5 (5.8)          | 1 (9.1)          | 3 (7.5)                 | 3 (5.3)          | 1 (2.6)           | 5 (8.6)   | 2 (3.9)          | 4 (8.7)          |
|              | <i>p</i> -level | 0.84      |           | 0.91             |                  | 0.86                    |                  | 0.47              |           | 0.60             |                  |
| <i>GSTP1</i> | Loss            | 5 (11.4)  | 6 (11.3)  | 9 (10.5)         | 2 (18.2)         | 4 (10.0)                | 7 (12.3)         | 4 (10.3)          | 7 (12.1)  | 6 (11.8)         | 5 (10.9)         |
|              | n               | 30 (68.2) | 36 (67.9) | 59 (68.6)        | 7 (63.6)         | 29 (72.5)               | 37 (64.9)        | 25 (64.1)         | 41 (70.7) | 36 (70.6)        | 30 (65.2)        |
|              | Gain            | 9 (20.5)  | 11 (20.8) | 18 (20.9)        | 2 (18.2)         | 7 (17.5)                | 13 (22.8)        | 10 (25.6)         | 10 (17.2) | 9 (17.6)         | 11 (23.9)        |
|              | <i>p</i> -level | 1         |           | 0.74             |                  | 0.72                    |                  | 0.60              |           | 0.74             |                  |

Note: Histological form: Uni - unicentric. Multi - multicentric; Menstrual status: Pre-premenopause. Post-postmenopause. Statistically significant differences are in bold.
